# Supplementary material for: Immuno-priming durvalumab with bevacizumab in HER2-negative advanced breast cancer: a pilot clinical trial
Source: PubMed Central journal article supplement (PMC7661209; doi:10.1186/s13058-020-01362-y), 2020-11-11

Figure Supplementary 2

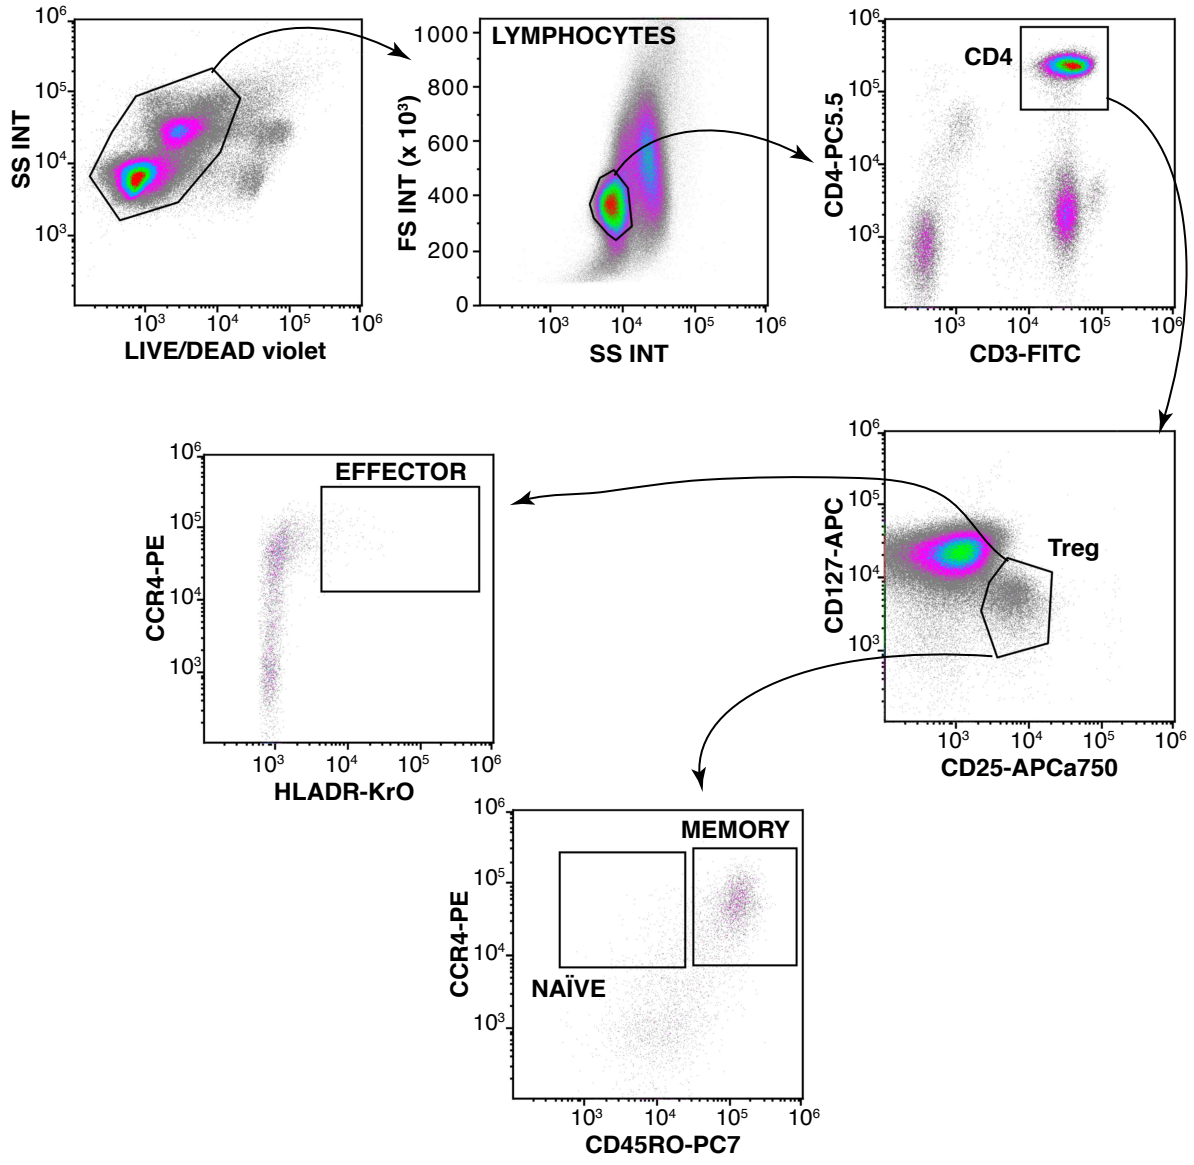

Supplement: 13058_2020_1362_MOESM2_ESM.pdf [file 13058_2020_1362_MOESM2_ESM.pdf]
